# Supplementary material
Source: Springer Nature journal article supplement (https://www.springermedizin.de/resource/supplementary/12916_2007_163_MOESM2_ESM.pdf/9599300)

**a**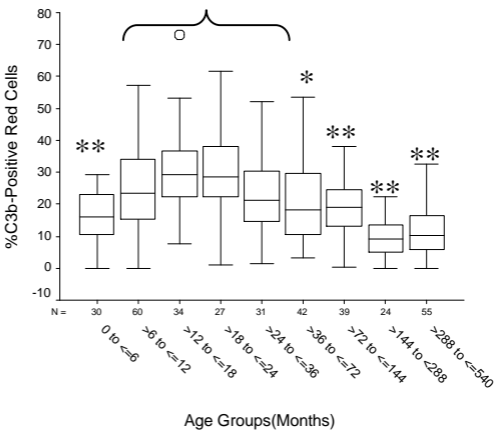**b**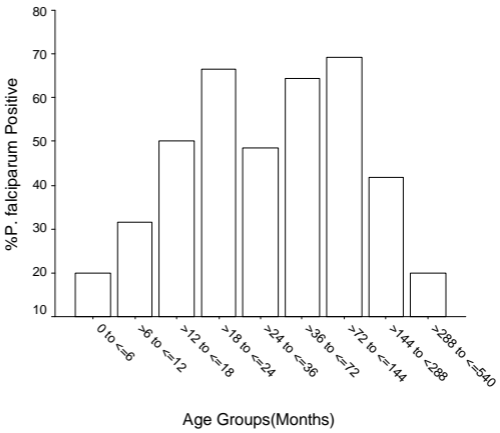**c**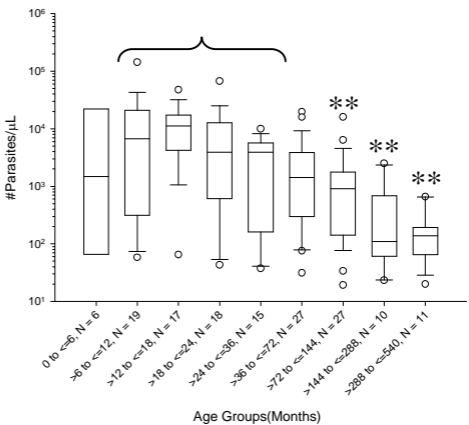

Supplement: MOESM2 [file 9599300]
